# Supplementary material for: A new chemical probe for the detection of the cancer-linked galectin-3
Source: Royal Society of Chemistry journal article supplement (doi:10.1039/b611050a), 2006-01-01

## Supporting Information

### **A New Chemical Probe for the Detection of Cancer-Linked Galectin-3**

Lluís Ballell, Monique van Scherpenzeel, Katerina Buchalova, Rob M.J. Liskamp, and

Roland J. Pieters\*

Department of Medicinal Chemistry and Chemical Biology, Utrecht Institute for  
Pharmaceutical Sciences, Utrecht University, P.O. Box 80082, 3508 TB Utrecht, The  
Netherlands

### Galectin-3 labeling studies in presence of protein mixture I

|                      |   |   |   |    |    |   |   |   |     |
|----------------------|---|---|---|----|----|---|---|---|-----|
| Probe (1) [ $\mu$ M] | - | - | - | 10 | 10 | 5 | 2 | 1 | 0.5 |
| 'Click'              | - | - | + | +  | +  | + | + | + | +   |
| hv                   | - | - | + | -  | +  | + | + | + | +   |
| Gal-3 (ng)           | - | + | + | +  | +  | + | + | + | +   |
| 6x protein           | + | - | + | +  | +  | + | + | + | +   |

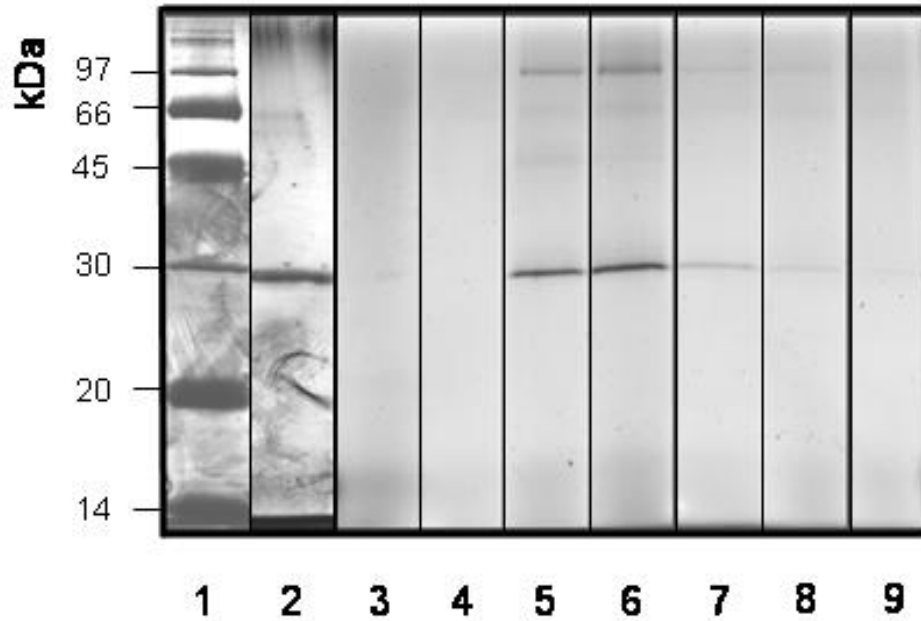

Effect of probe concentration on labeling intensity in the presence of protein mix I. Lanes 1 and 2 are silver stained, lanes 3-9 fluorescent pictures.

## Galectin-3 labeling studies in presence of protein mixture II

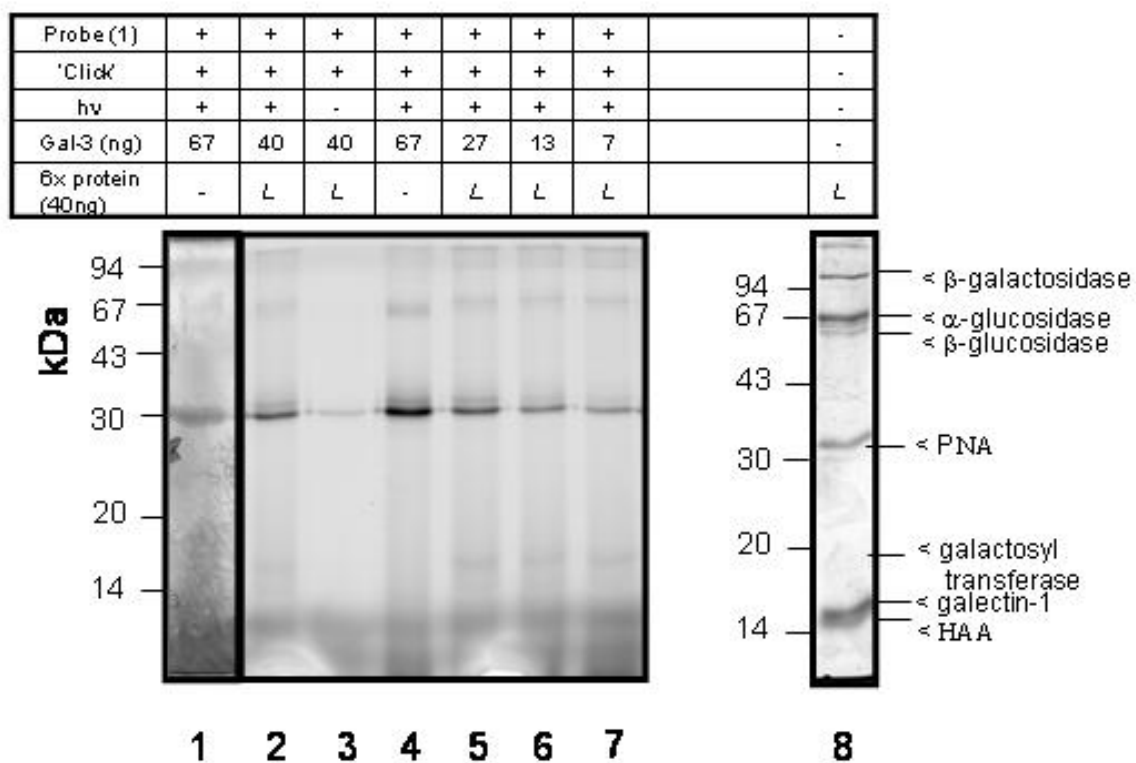

Selectivity of probe 1 for galectin-3 in presence of protein mixture II

### Monovalent probe 3 concentration-dependent labeling studies.

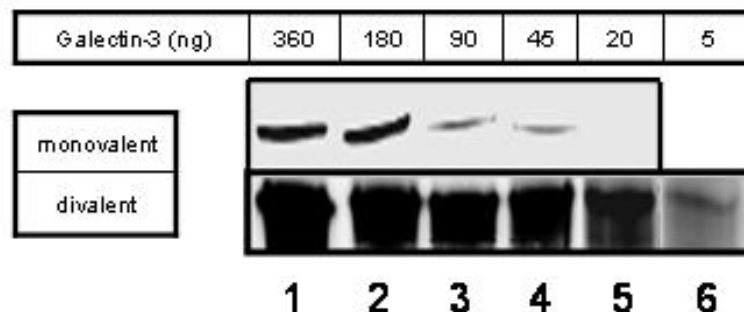

Figure 3 Galectin-3 labeling studies with variation of Galectin-3 quantity at 5  $\mu$ M monovalent probe 3 or divalent probe 1.

**Labeling studies with variation of Galectin-3 quantity (probe 3).** An aliquot of 5  $\mu$ L of monovalent probe 3 (50  $\mu$ M in water) or 1 (50  $\mu$ M in water : DMSO 20:1) was added to varying amounts of galectin-3 (20, 10, 5, 2.5, 1.1  $\mu$ L of 125  $\mu$ g/mL stock solution and 2.8  $\mu$ L of a 12.5  $\mu$ g/mL stock solution respectively), and the total volume was adjusted to 50  $\mu$ L in HEPES buffer. The samples were then photoincubated, “clicked” to the fluorescent dye 2, loaded onto the gel and visualized as described above. The experiments for probe 1 were performed similarly.

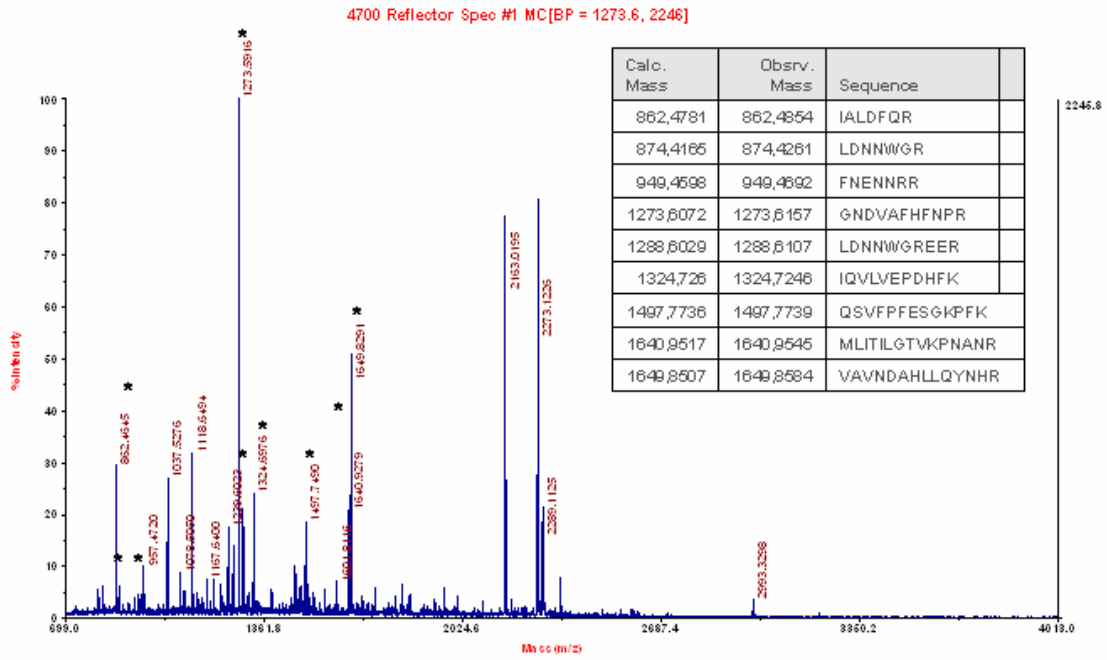

MALDI spectrum of the excised protein band indicated in figure 2, lane 6. Asterisks indicate 9 peptides from a tryptic digest of galectin-3

<sup>13</sup>C NMR spectrum of 4

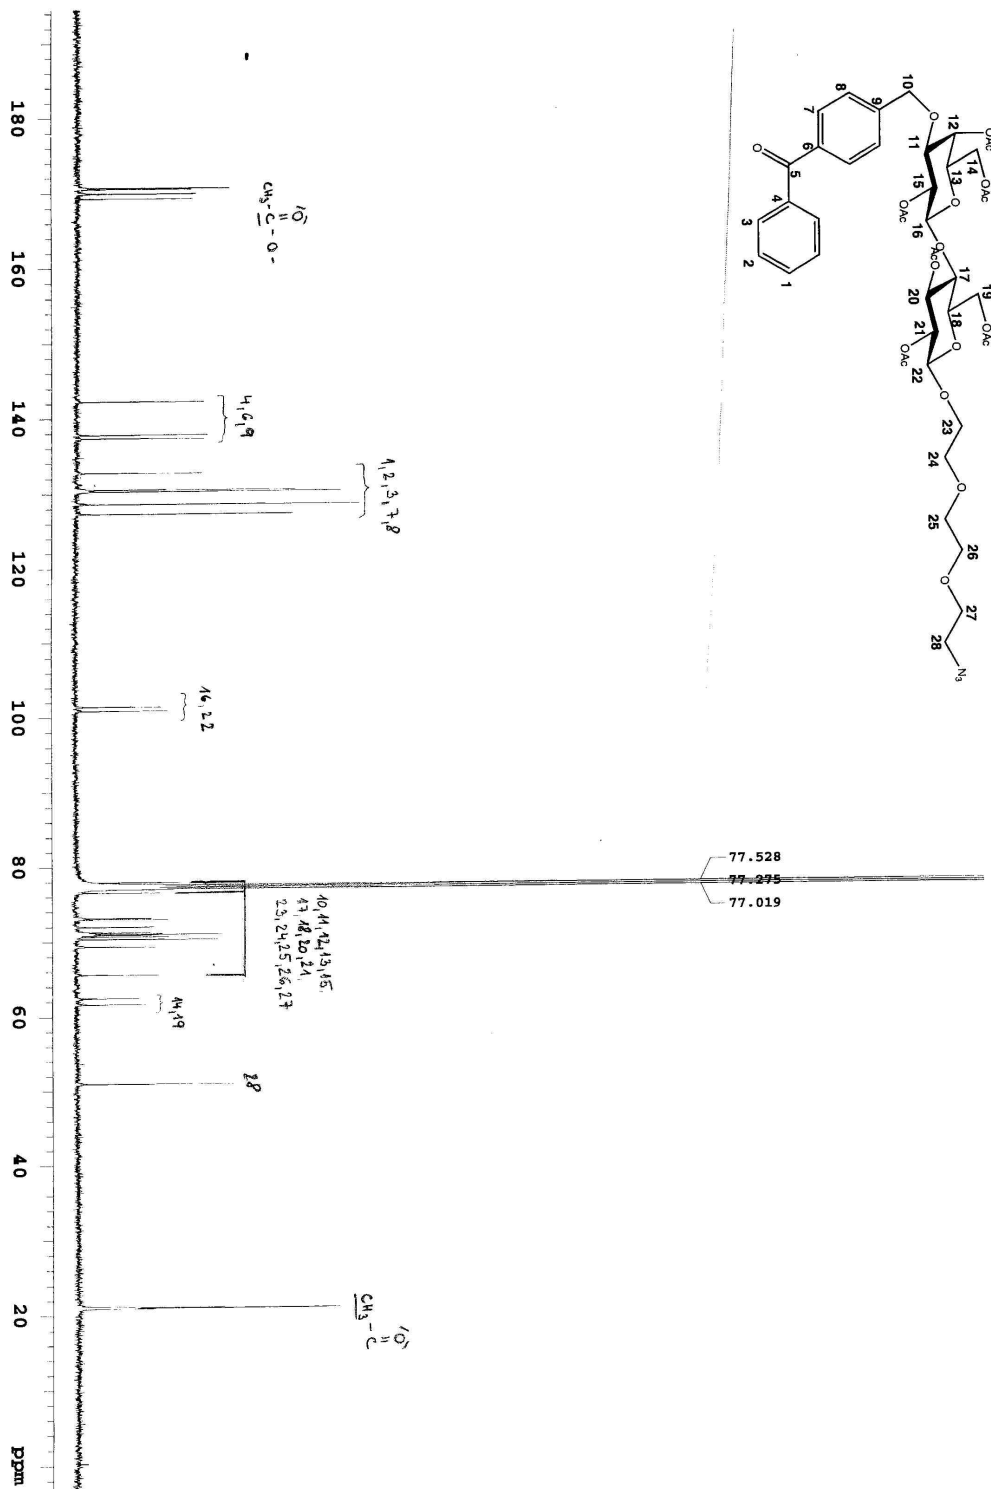

$^{13}\text{C}$  NMR spectrum of 5

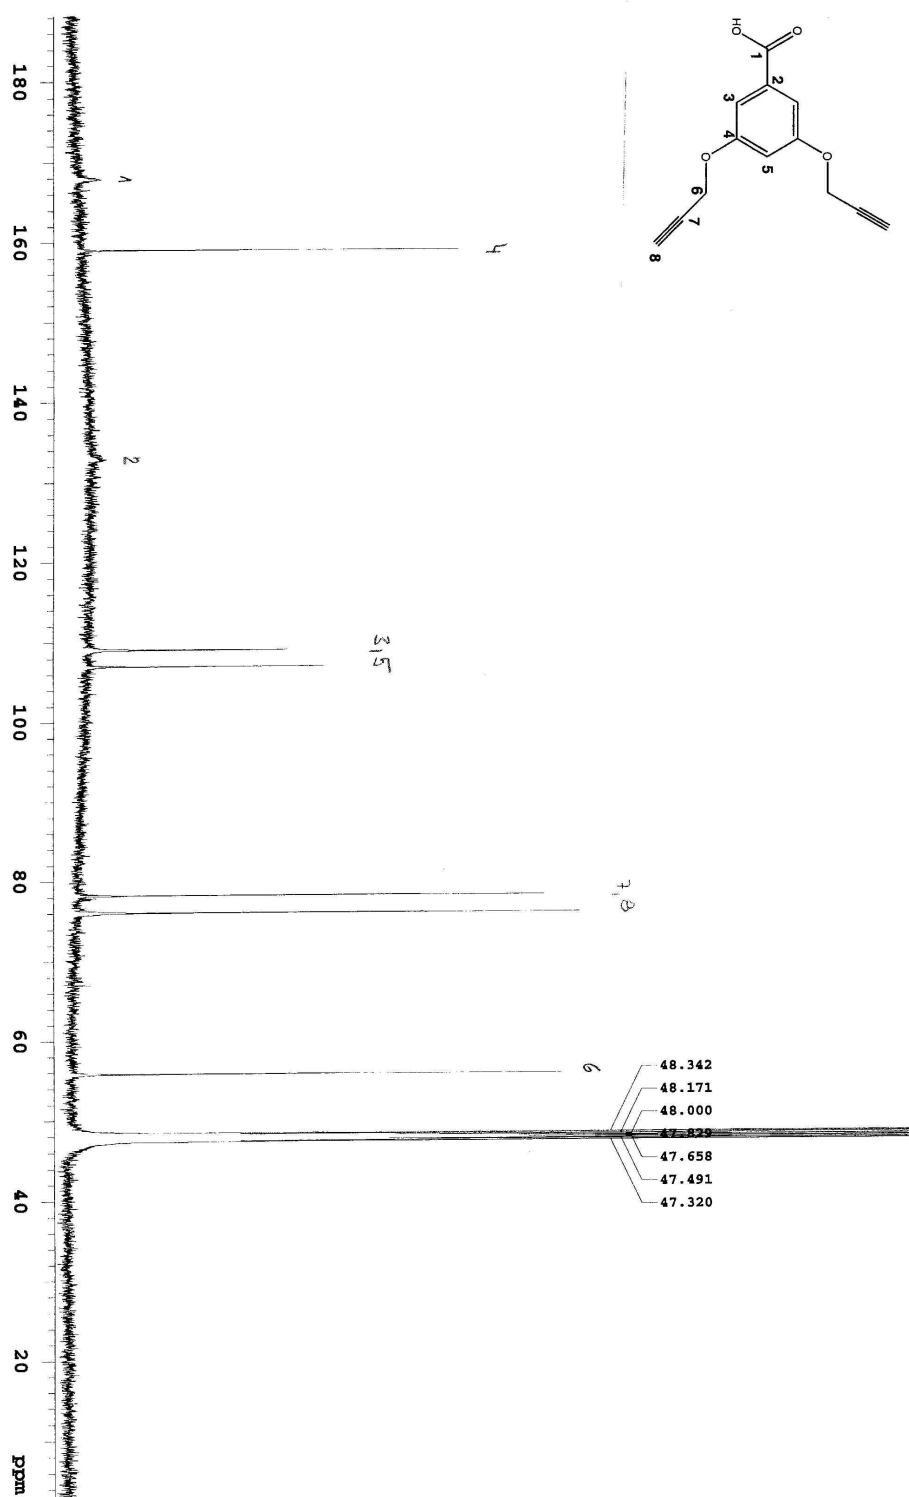

(1)

<sup>13</sup>C NMR spectrum of 6

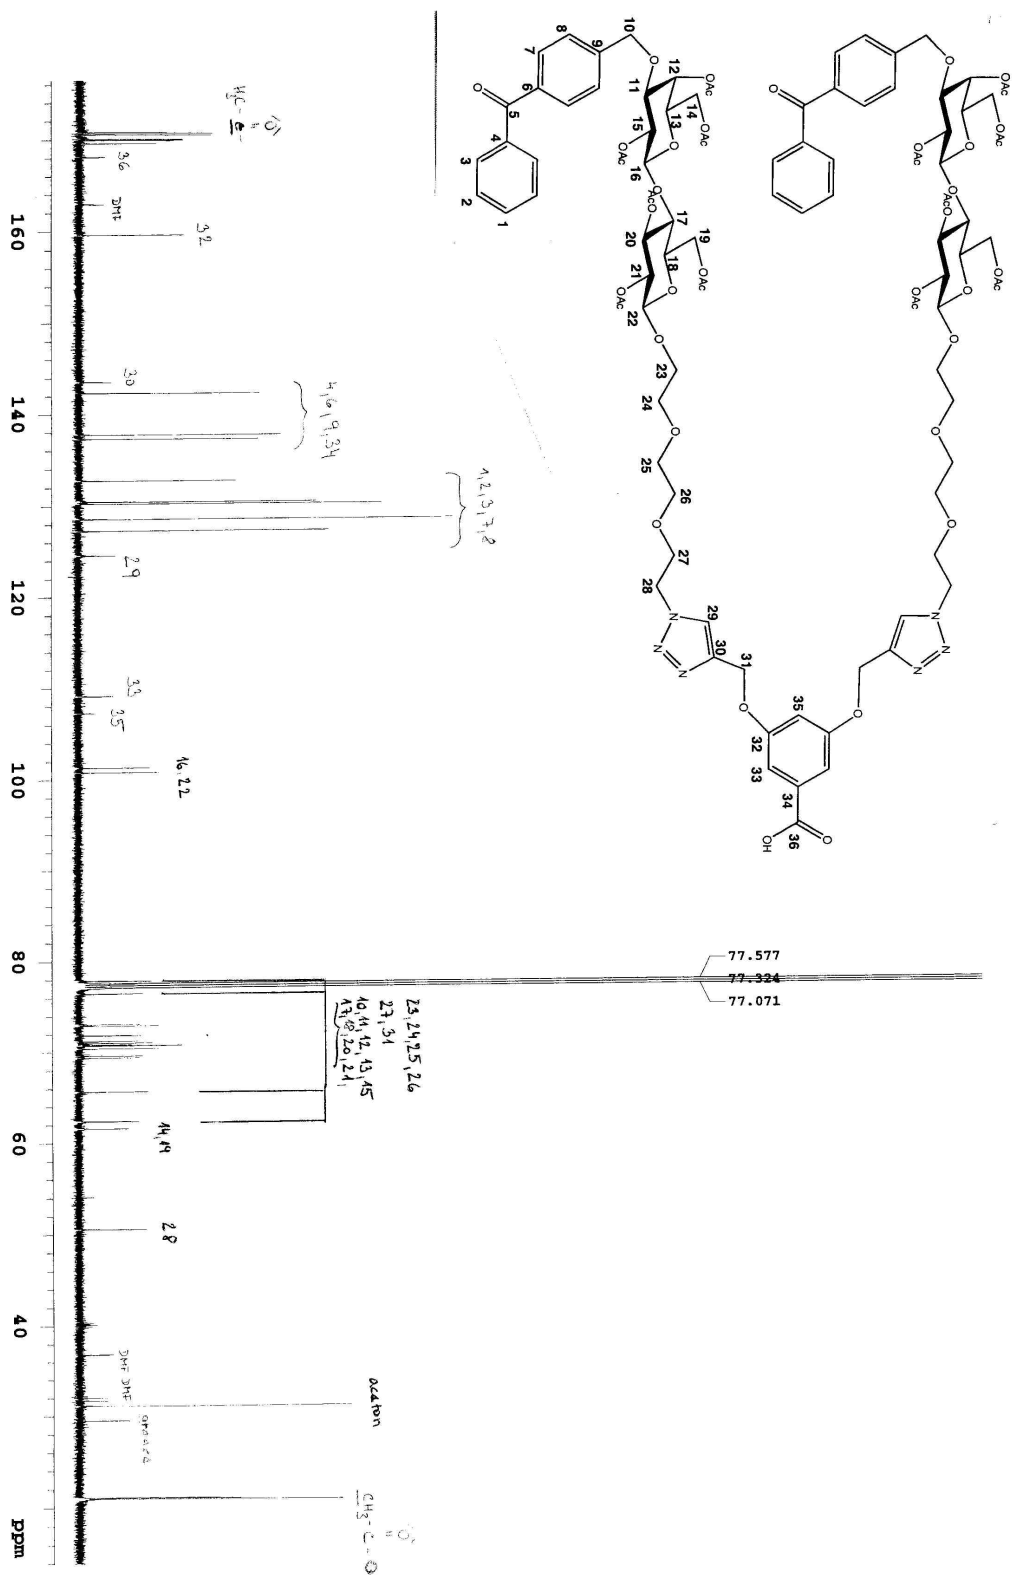



<sup>13</sup>C NMR spectrum of protected **1**

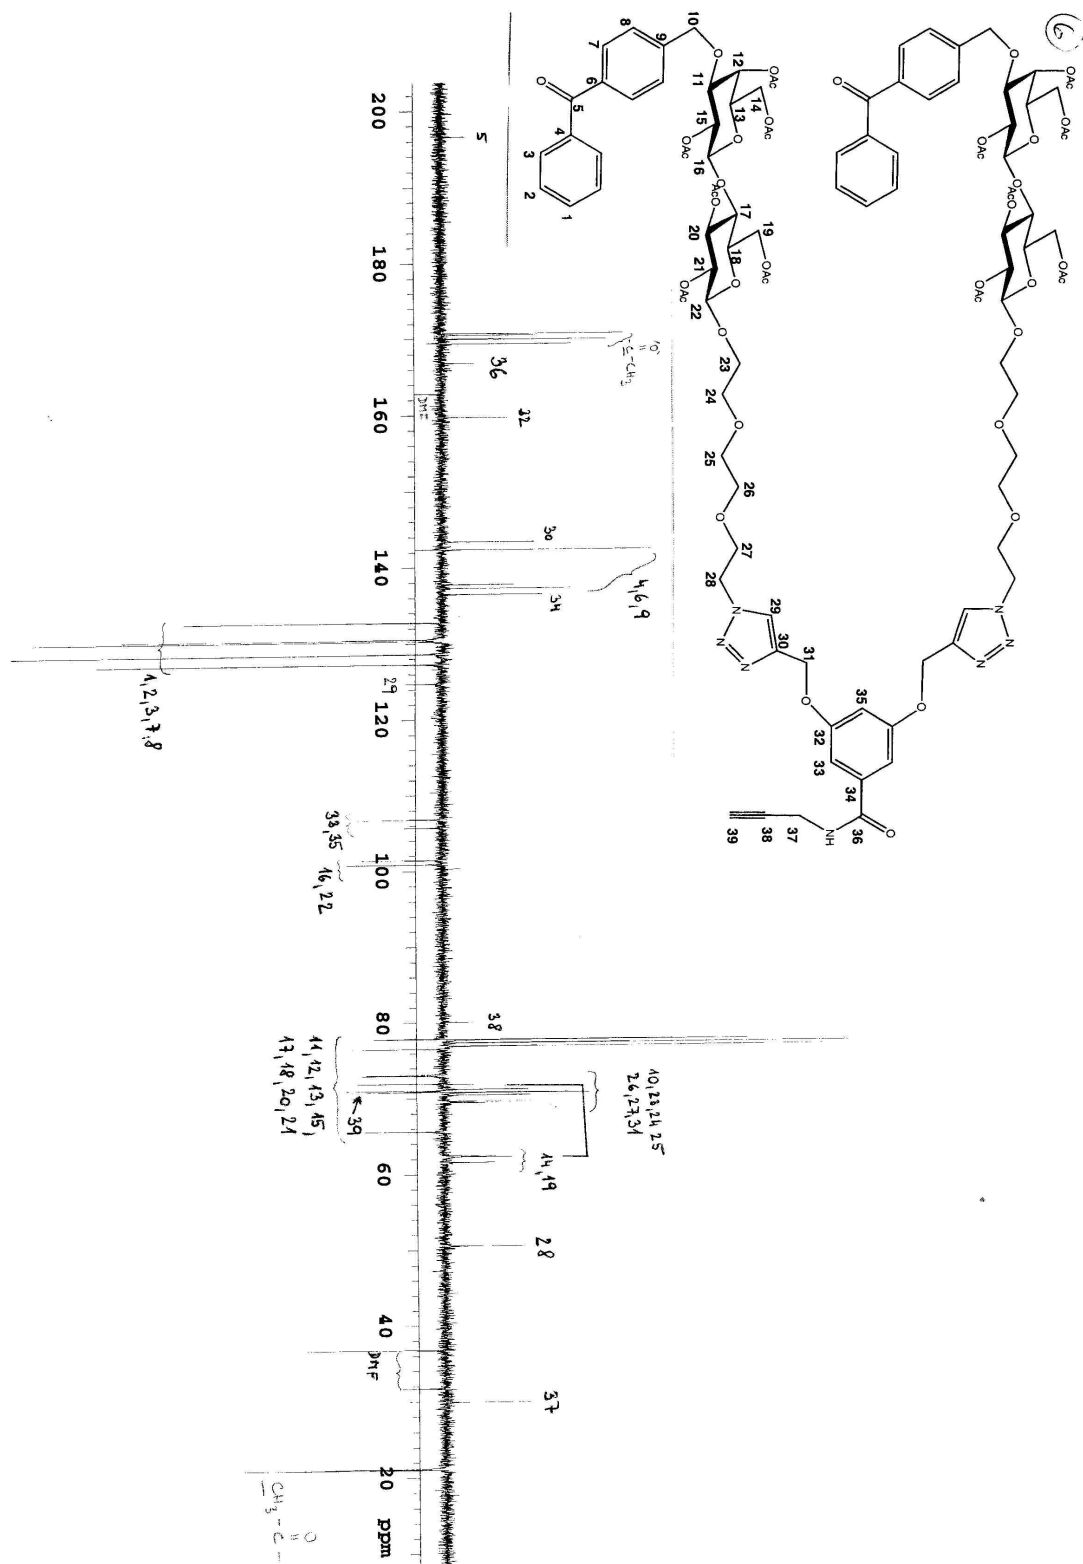

<sup>13</sup>C NMR spectrum of 1

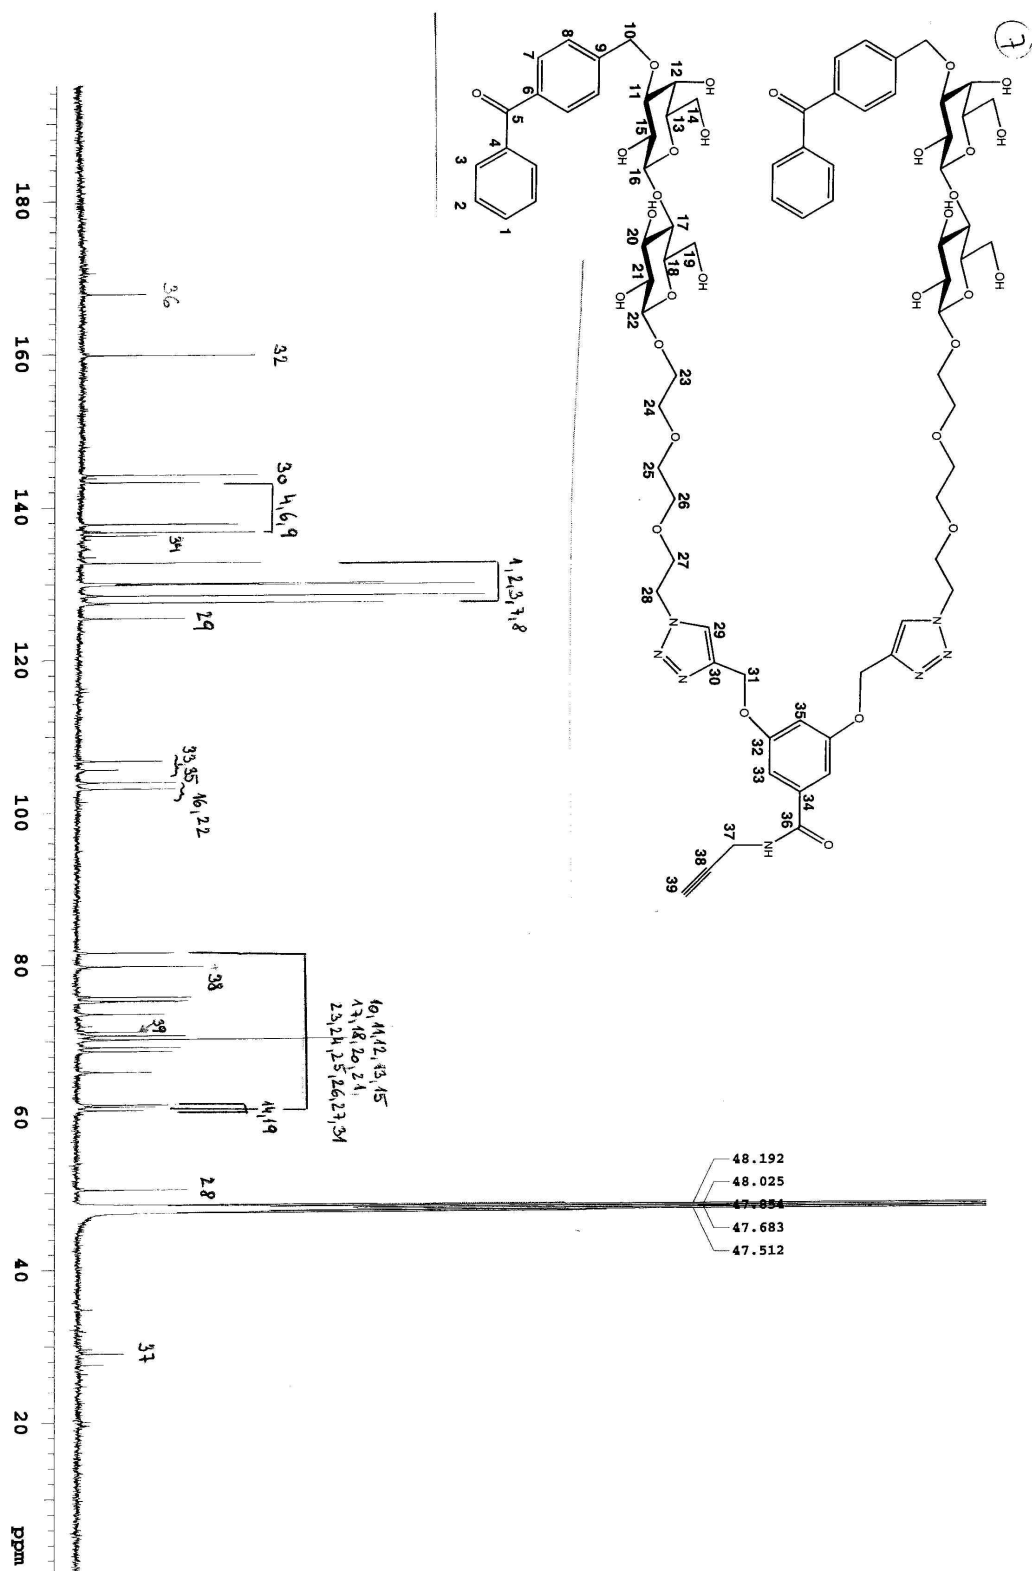

$^{13}\text{C}$  NMR spectrum of monofunctionalized 7

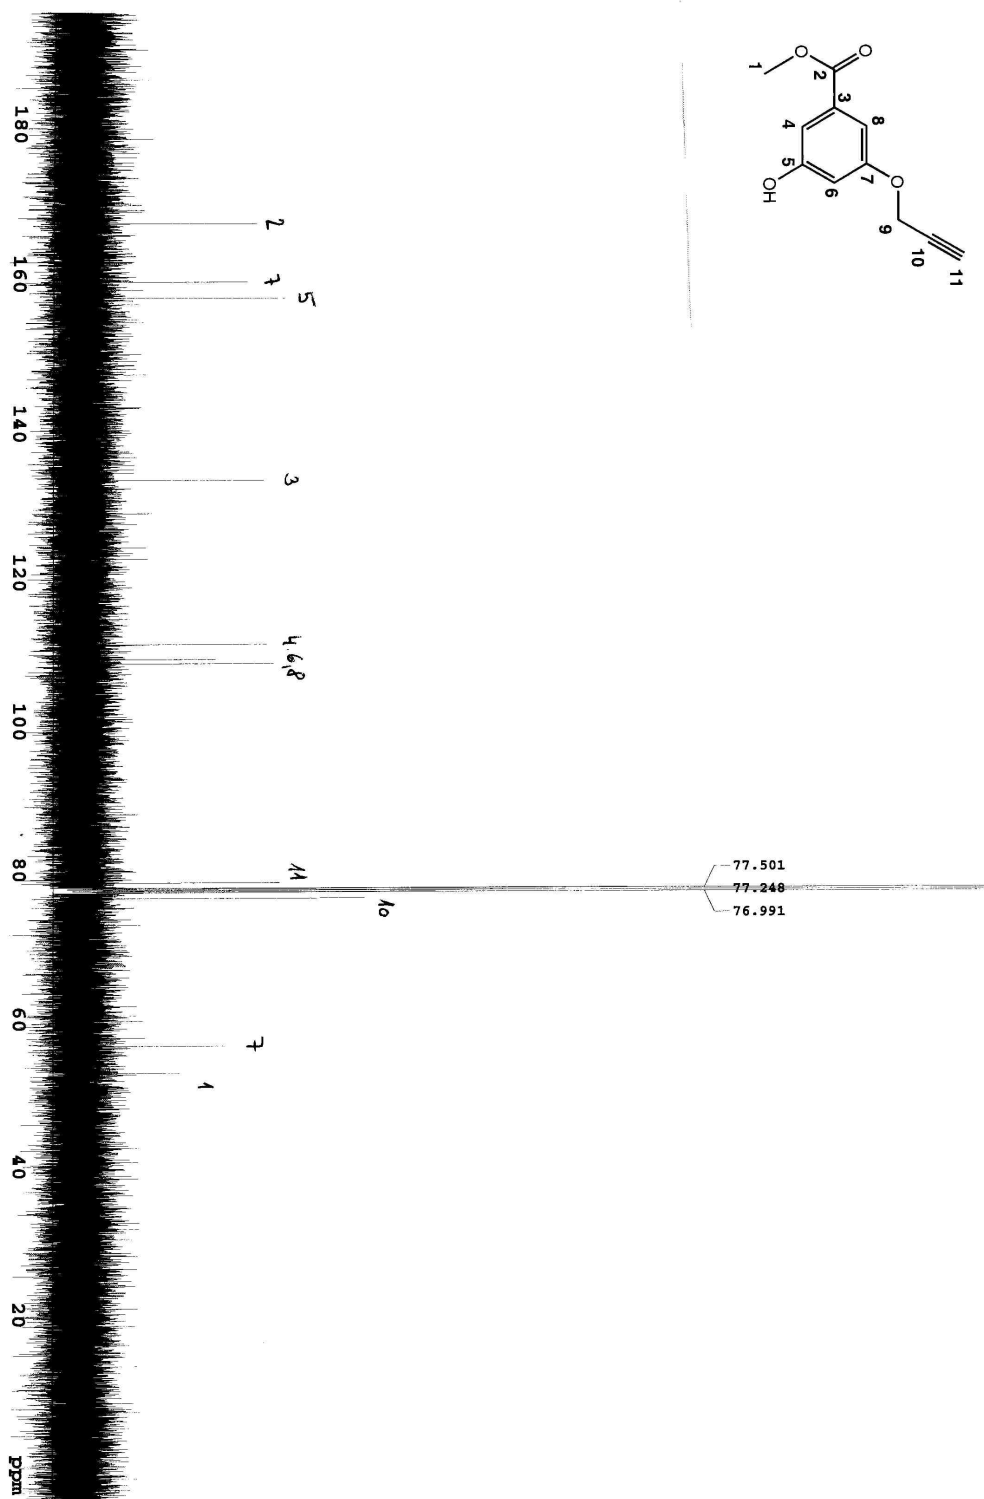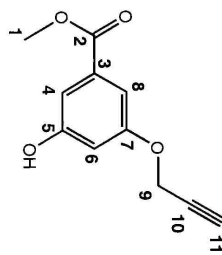

<sup>13</sup>C NMR spectrum of 8

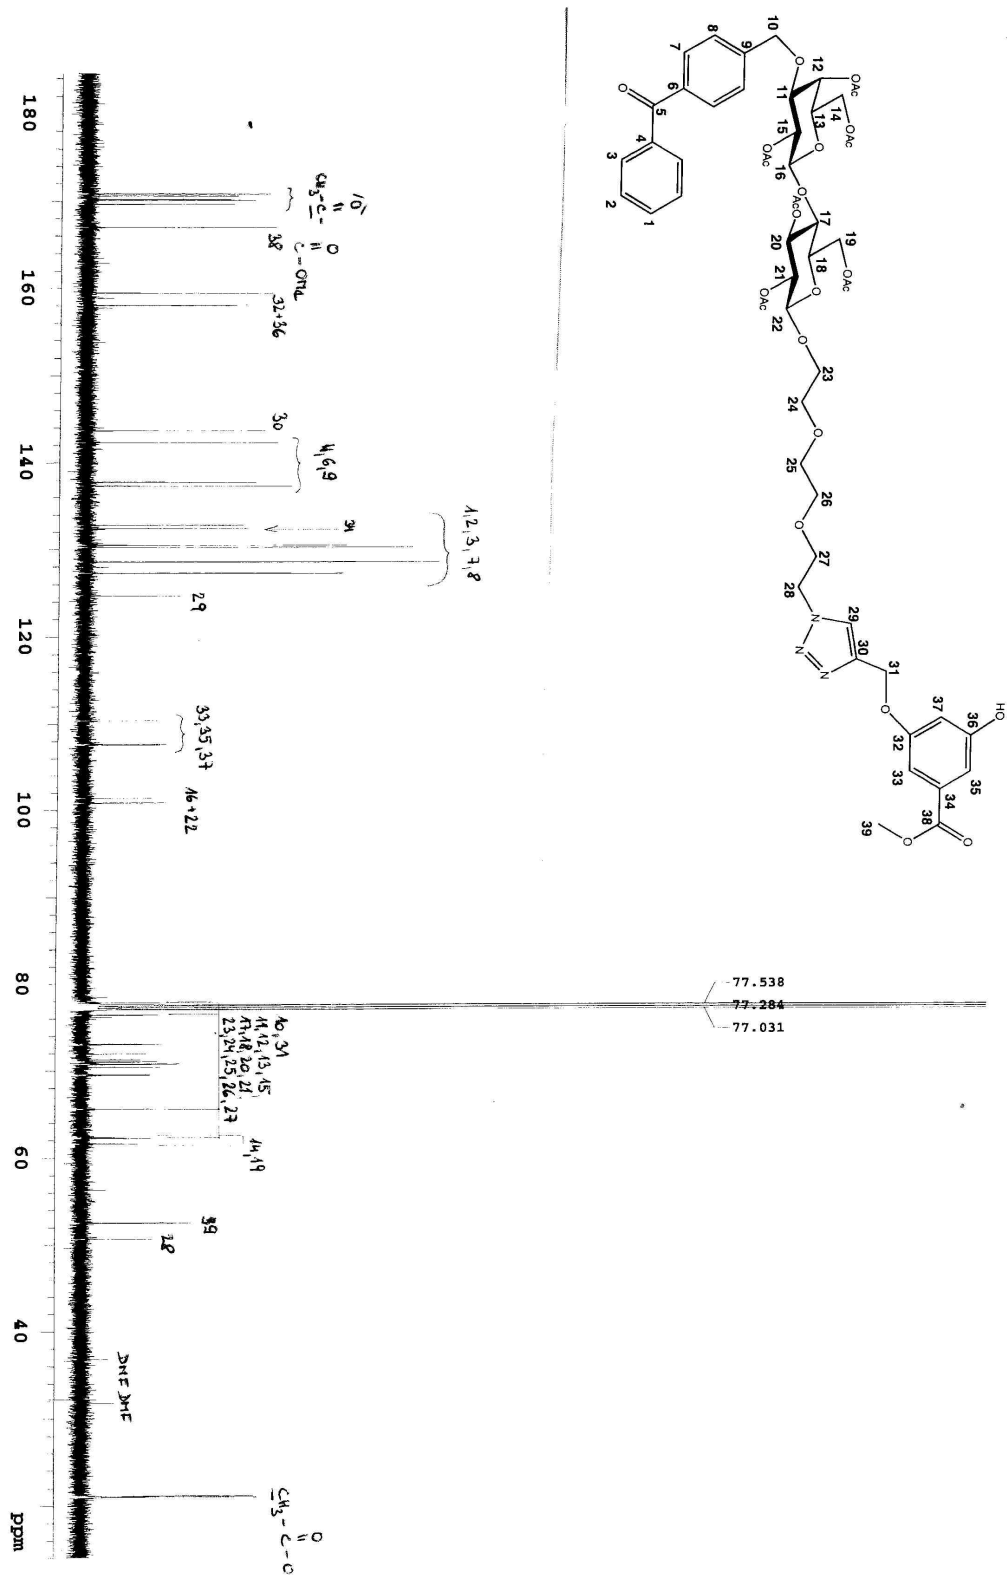

<sup>13</sup>C NMR spectrum of 9

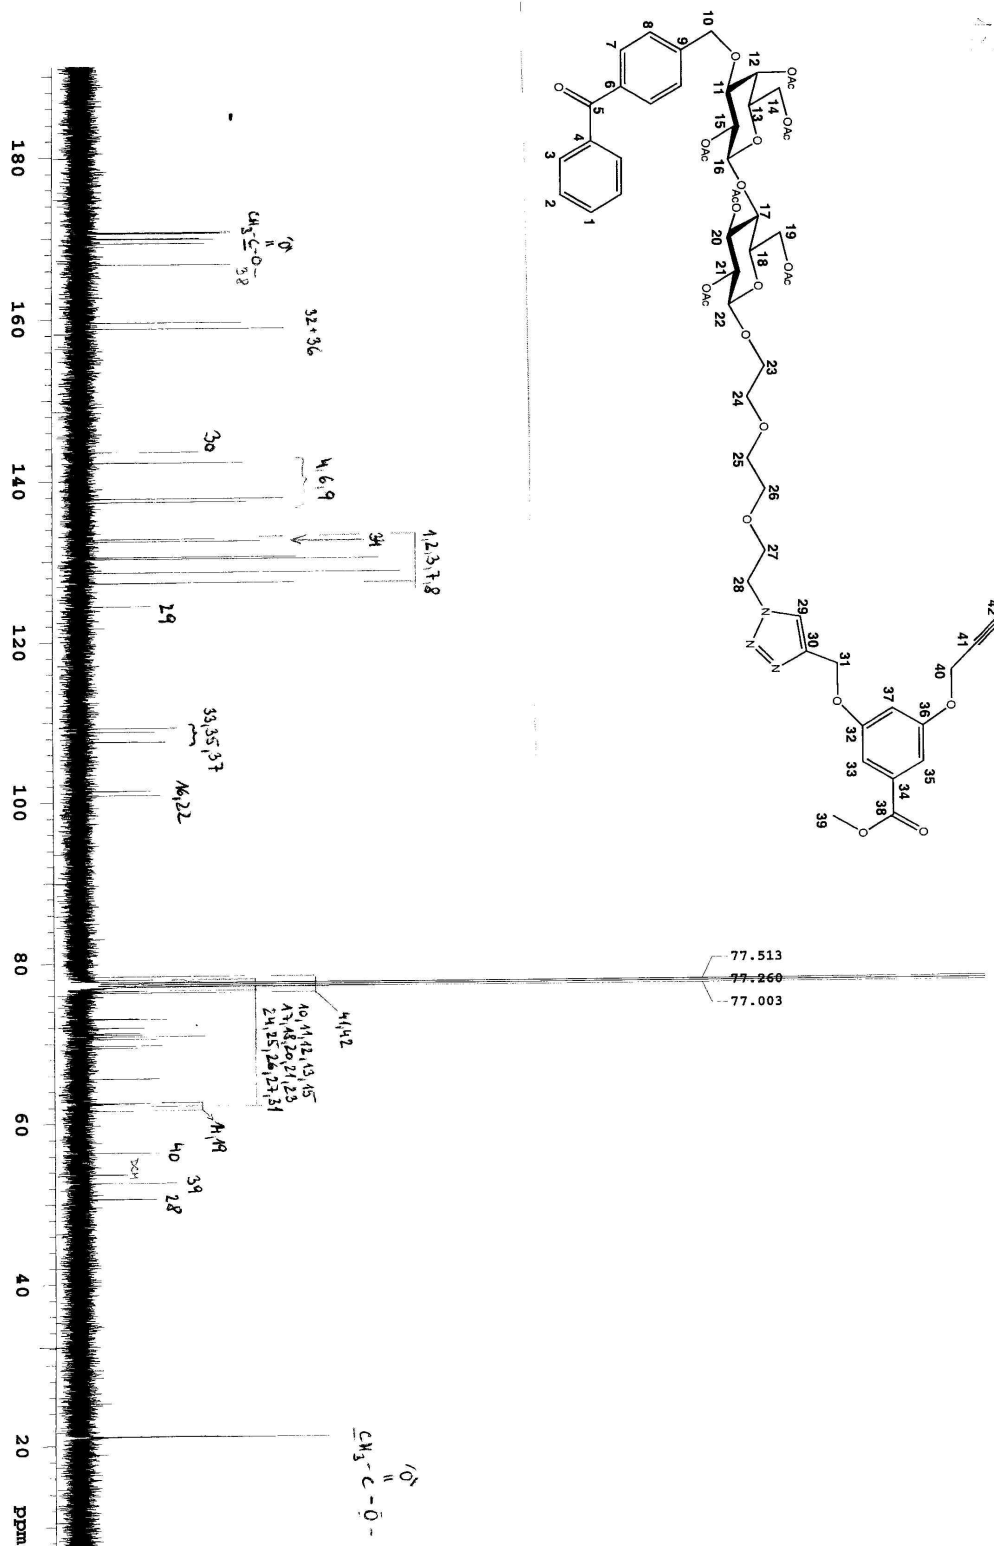

<sup>13</sup>C NMR spectrum of 3

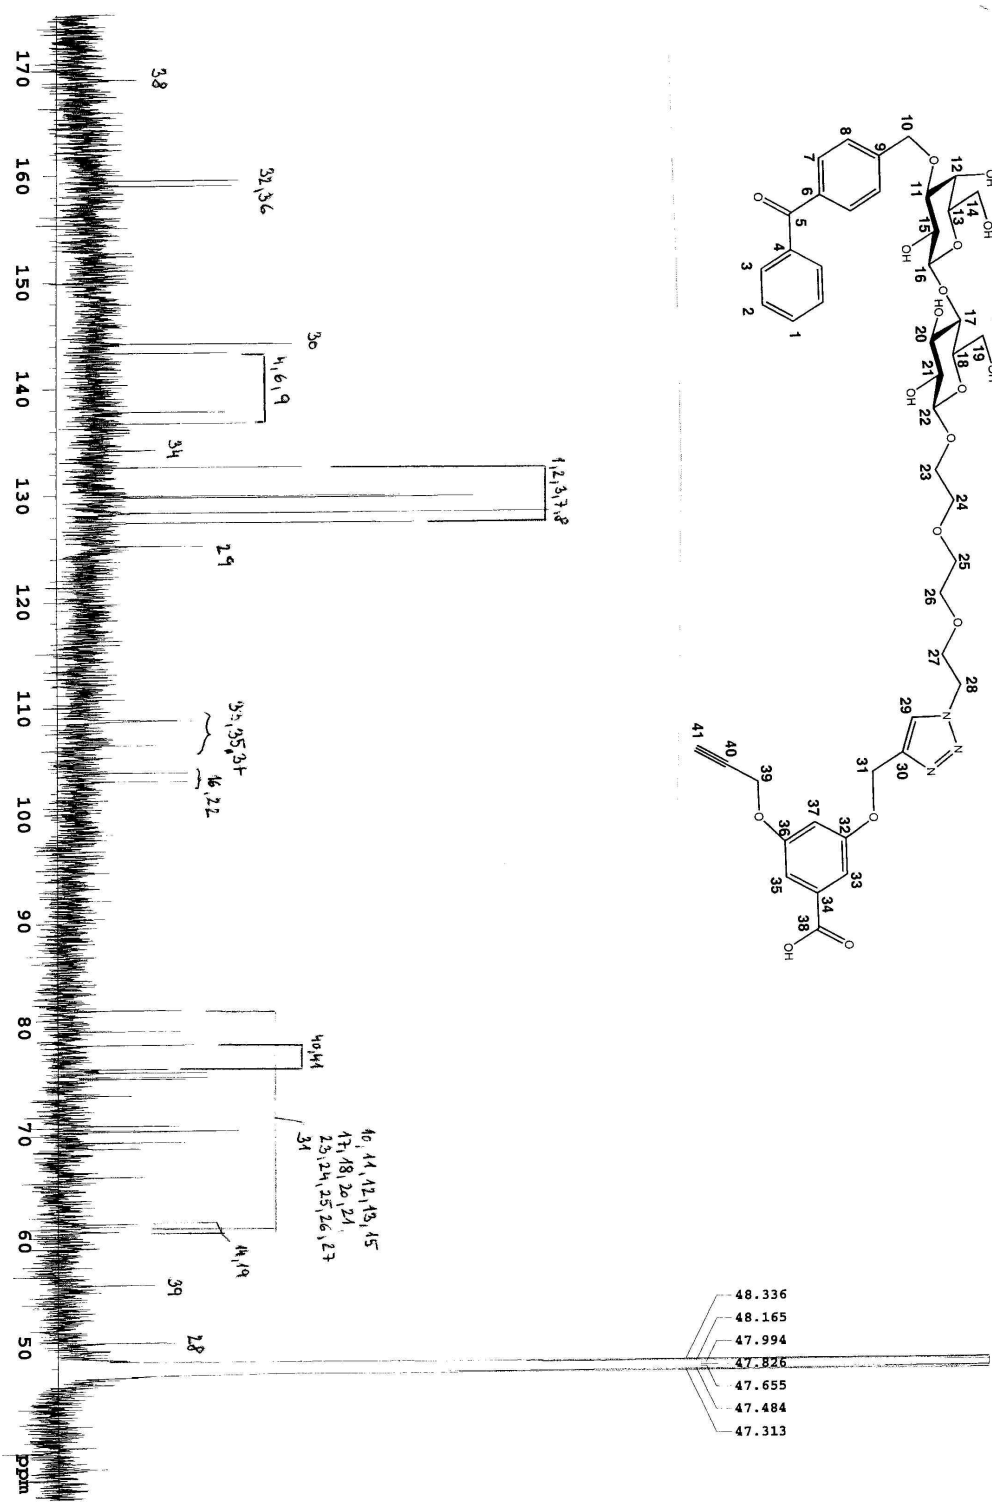



<sup>1</sup>H NMR spectrum of 5

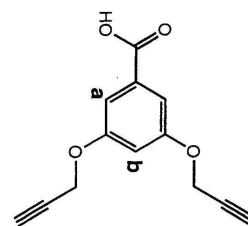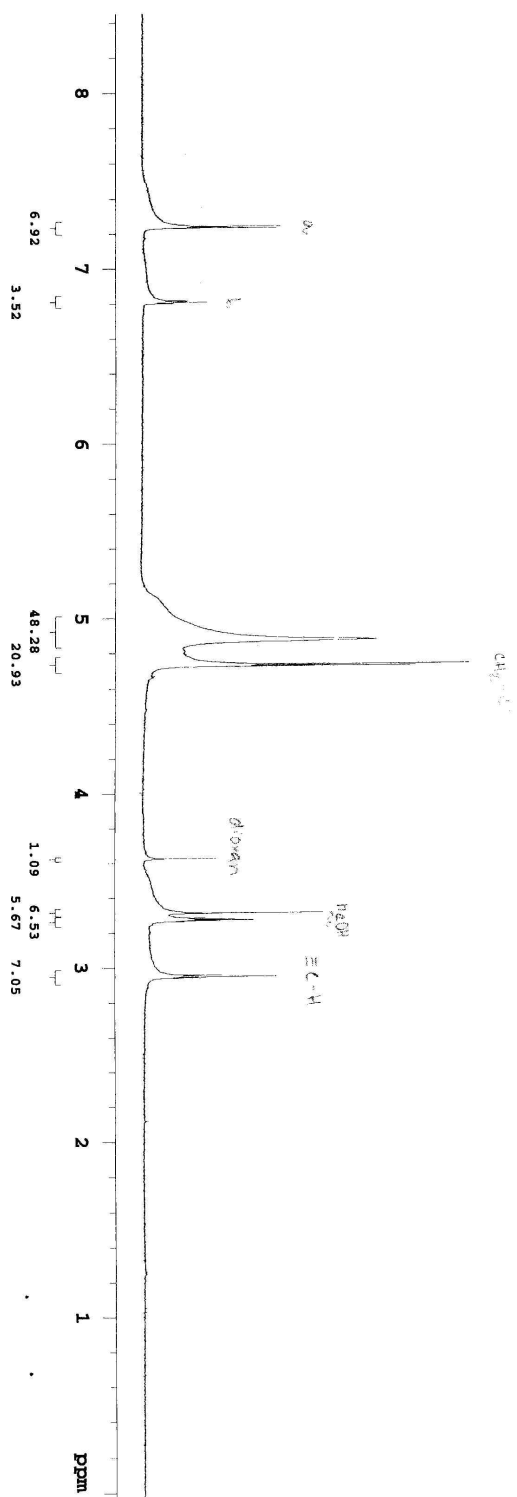





<sup>1</sup>H NMR spectrum of protected 1

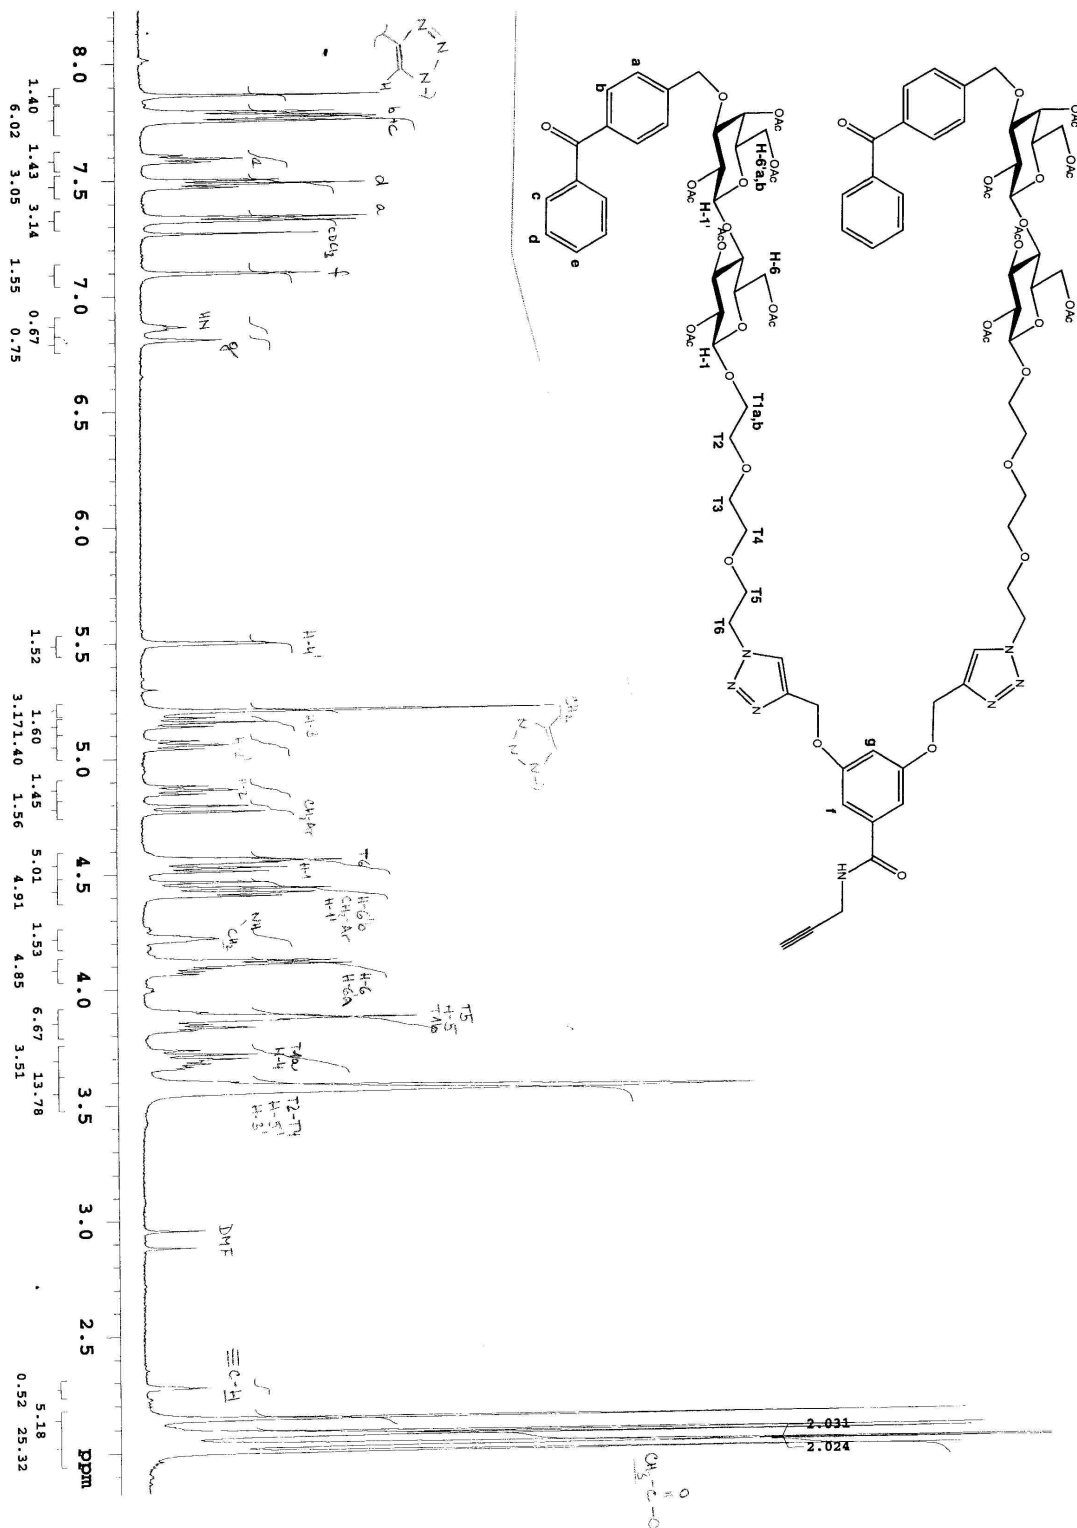



<sup>1</sup>H NMR spectrum of monofunctionalized 7

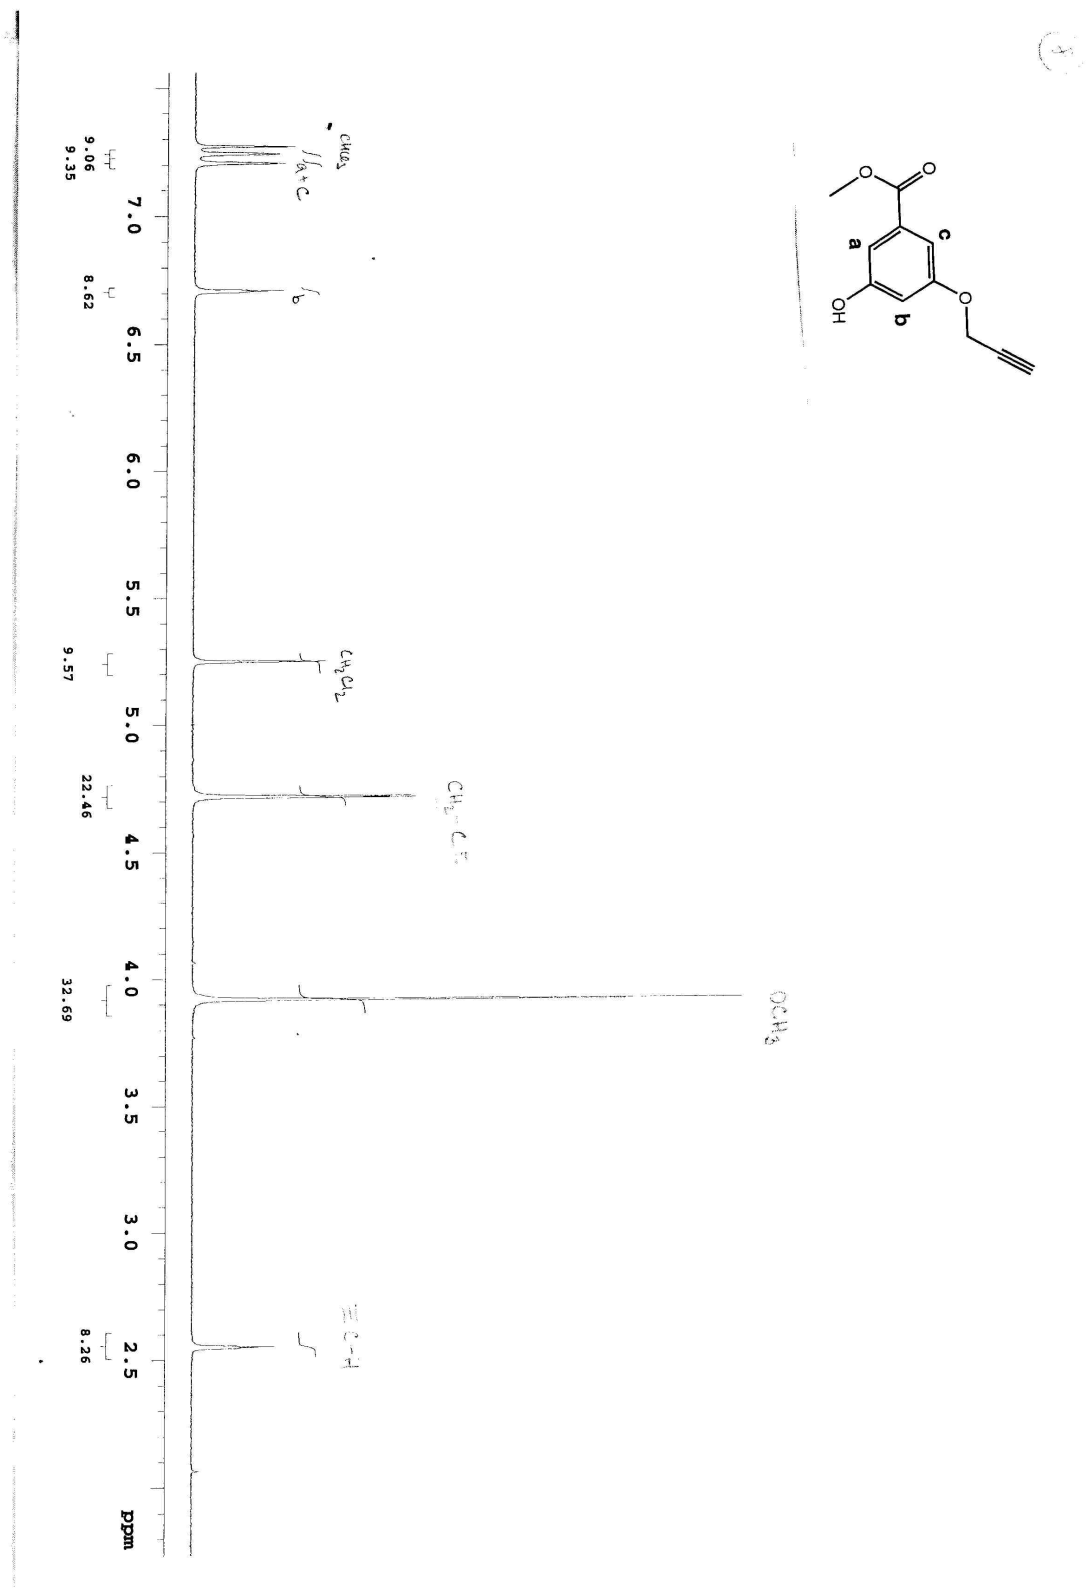



<sup>1</sup>H NMR spectrum of 9

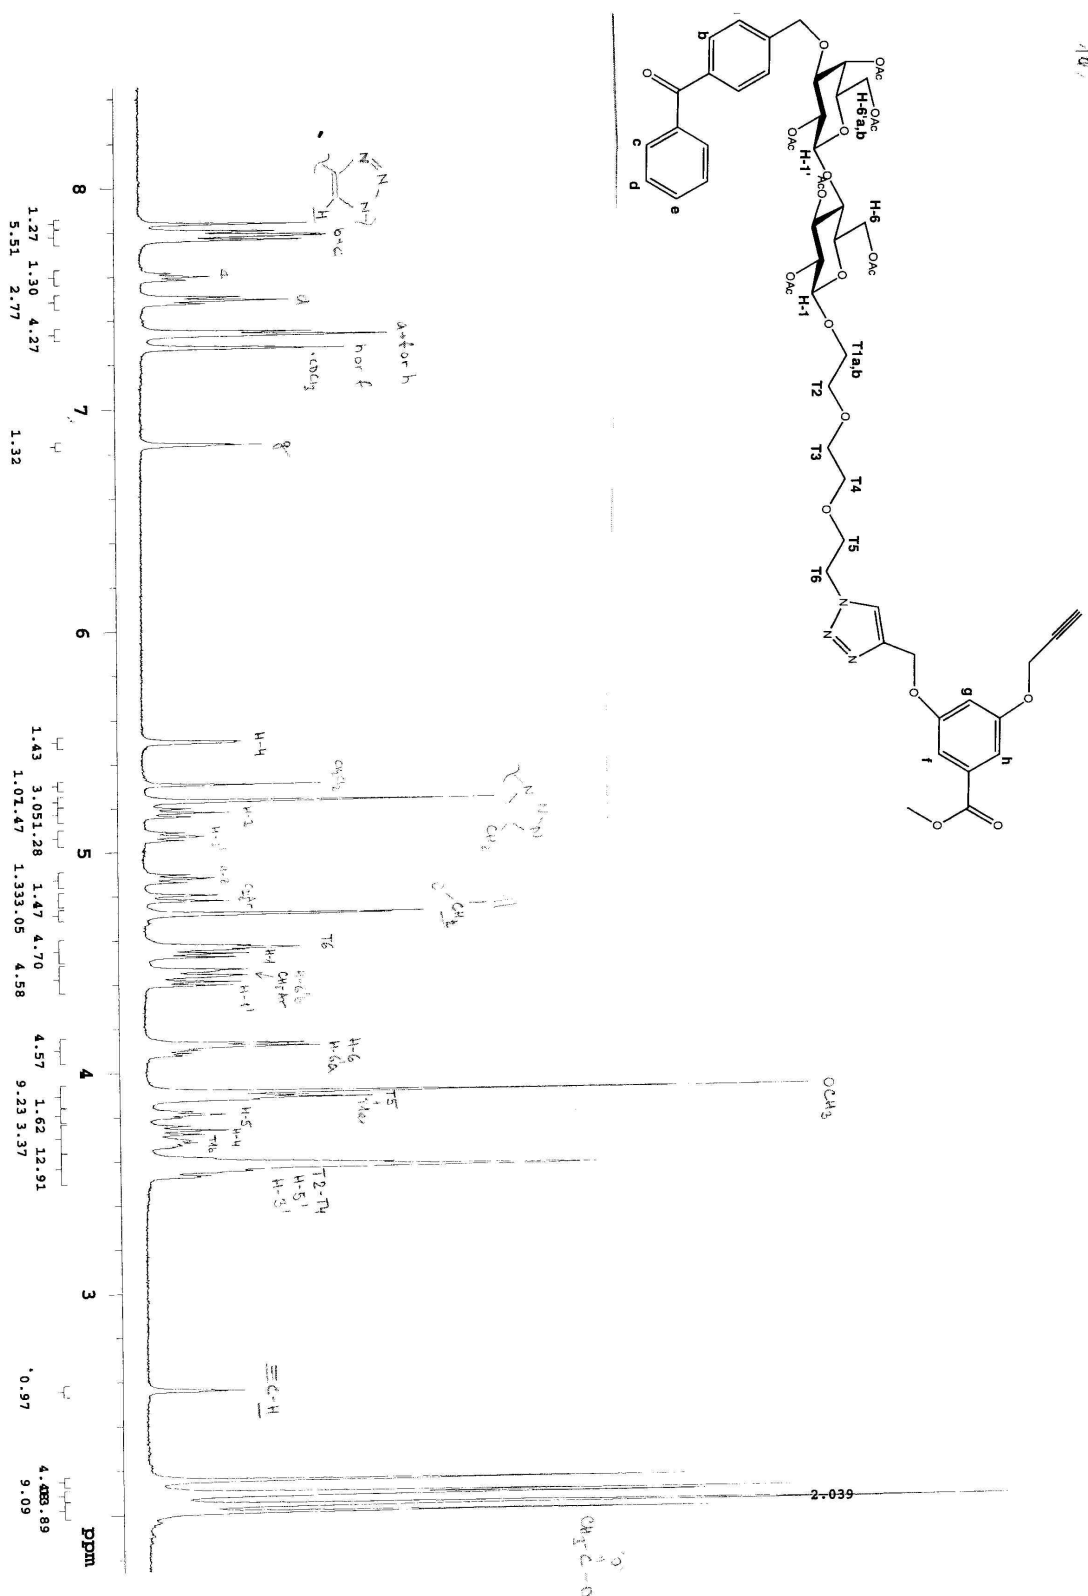

<sup>1</sup>H NMR spectrum of 3

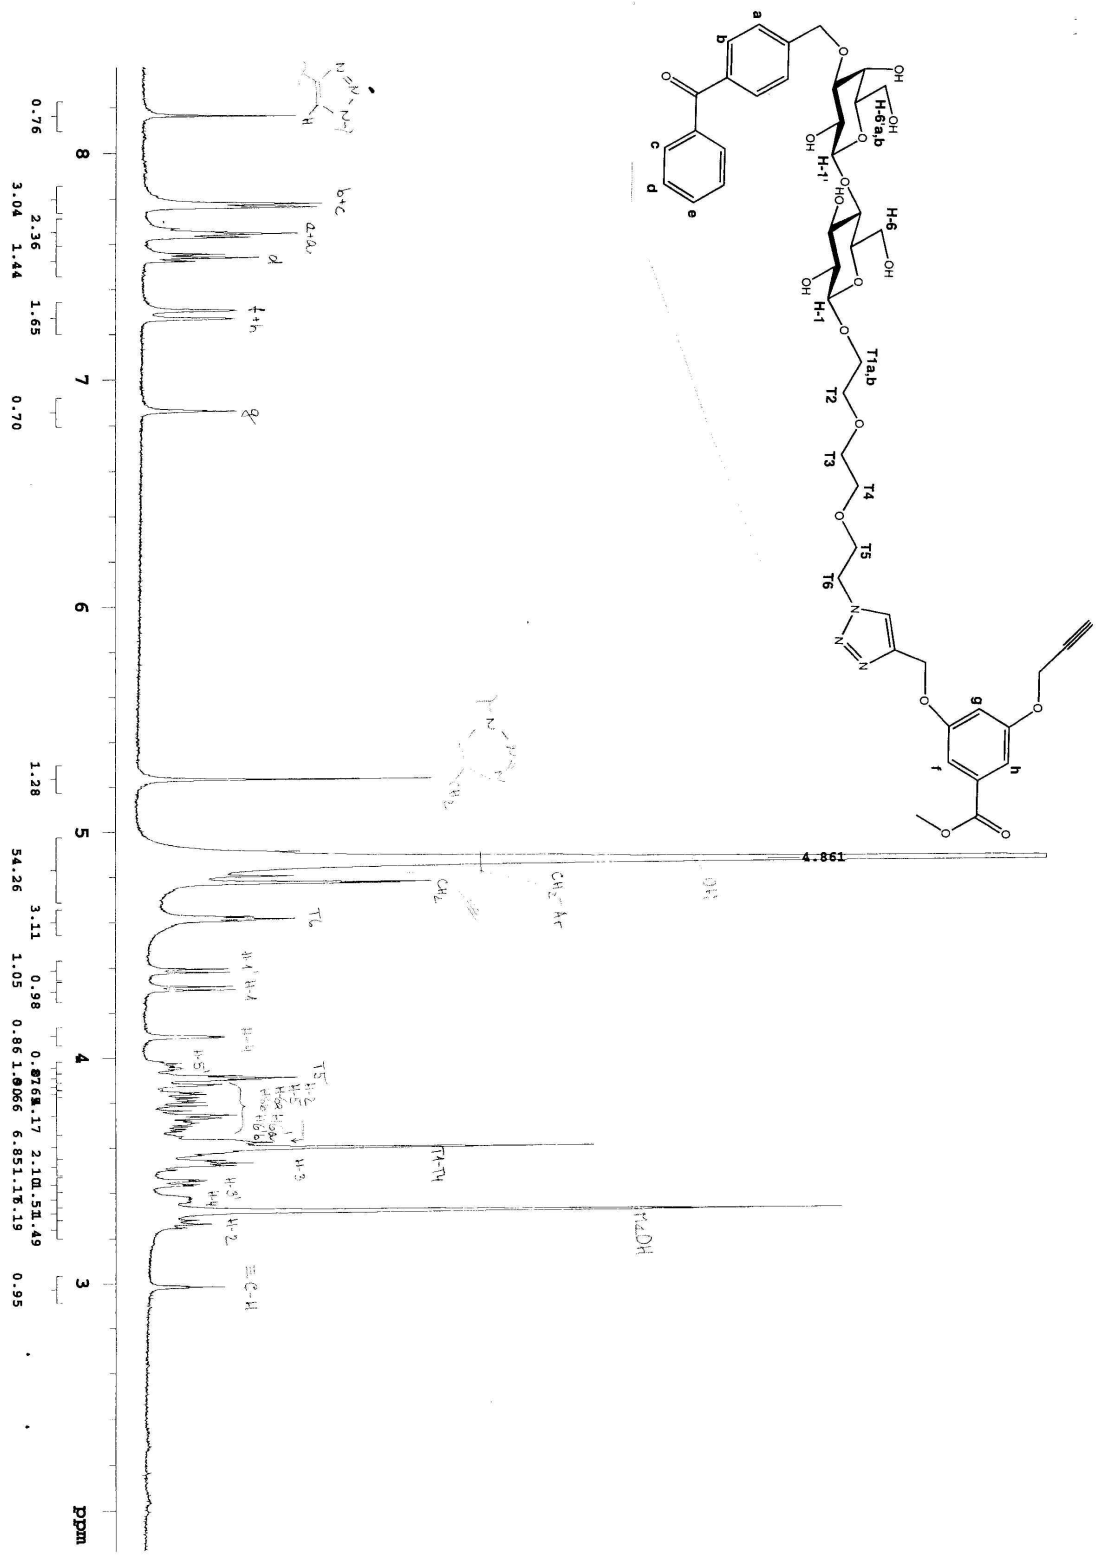

Supplement: b611050a.pdf [file b611050a.pdf]
